# Supplementary material
Source: bioRxiv or medRxiv preprint supplement (https://www.biorxiv.org/content/biorxiv/early/2018/12/08/482406/DC1/embed/media-1.pdf)
Supplement: Supplementary file [file media-1.pdf]

**Regional connectivity, local environmental conditions, and biotic interactions jointly structure a temperate seagrass epifaunal metacommunity**

Keila A Stark<sup>1\*</sup>, Patrick L Thompson<sup>1</sup>, Jennifer Yakimishyn<sup>2</sup>, Lynn Lee<sup>3</sup>, Mary I O'Connor<sup>1</sup>

1. Department of Zoology  
Biodiversity Research Centre  
University of British Columbia  
V6T 1Z4  
Vancouver, BC, Canada

2. Pacific Rim National Park Reserve  
P.O. Box 280  
Ucluelet, BC, Canada

3. Gwaii Haanas National Park Reserve, National Marine Conservation Area Reserve, and Haida Heritage Site  
60 Second Beach Road  
Skidegate, BC, Canada

\*Corresponding author: [keila.stark@zoology.ubc.ca](mailto:keila.stark@zoology.ubc.ca)

**Appendix S1:** Supporting Information

**Equation S1.** Equations for  $D^2_{adj}$  calculations

Explained deviance or  $D^2$  (Guisan and Zimmerman 2000) was calculated by the equation:

$$D^2 = 1 - \text{Residual deviance} / \text{Null deviance}$$

Where the residual deviance refers to the deviance in predicted species occurrences, and the null deviance refers to deviance in observed species occurrences.

Adjusted  $D^2$  (Guisan and Zimmerman 2000) was calculated by the equation:

$$D^2_{adj} = 1 - ((n-1)/(n-p-1)) * (D^2 - 1)$$

Where  $n$  is the number of sites (13) in our study, and  $p$  is the number of parameters the model estimated (4, Ovaskainen et al. 2017, Supporting Information). Negative  $D^2_{adj}$  values (those which had greater residual deviance than null deviance) were set to 0.

**Equation S2.** Calculation for type III variation partitioning result

$m1$  = the fraction of variation explained by all environmental variables in the HMSC model estimated with only environmental variables;

$m2$  = the fraction of variation by spatial distances in the version of the HMSC model estimated with only spatial distances;

$m3$  = the global model including both;

Fraction  $ab$  (pure environment + shared fraction) =  $D^2_{adj} m1$

Fraction  $bc$  (pure space + shared fraction) =  $D^2_{adj} m2$

Fraction  $abc$  (pure environment + shared fraction + pure space) =  $D^2_{adj} m3$

Fraction  $a$  (pure environment) =  $abc - bc$

Fraction  $c$  (pure space) =  $abc - ab$

Fraction  $b$  (shared fraction) =  $ab + bc - abc$

Fraction  $d$  (residuals) =  $1 - abc$

Fractions  $a$  ("Environmental conditions"),  $c$  ("Spatial distance"),  $b$  (shared fraction), and  $d$  ("Residuals") are shown in the Venn diagram in Fig. S3.

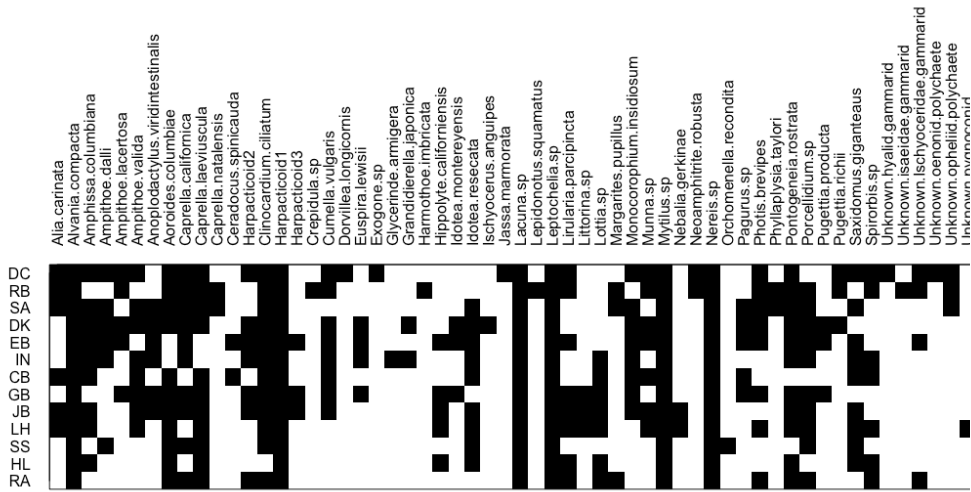

**Figure S2.** Site-by-species presence-absence matrix of all 58 invertebrate species in the study listed in alphabetical order. Black cells indicate species presences.

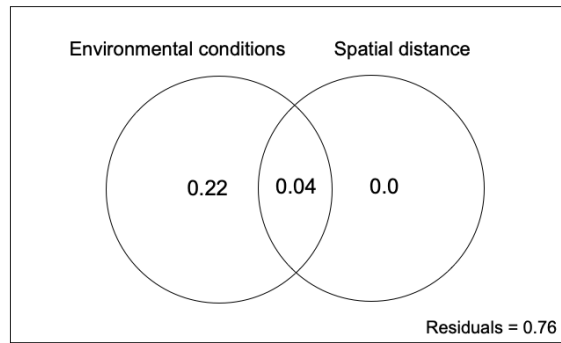

**Figure S3.** Venn diagram summarizing the fractions of variation explained by environmental covariates only (9 water quality and 5 biotic variables), spatial distance only, and the shared fraction explained by environment and space.

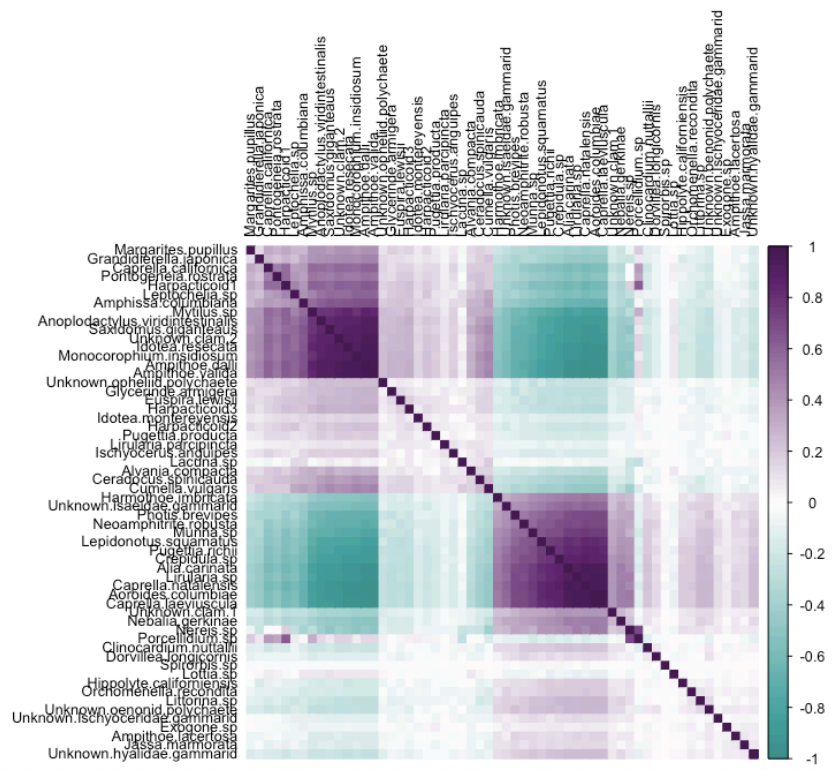

**Figure S4.** A correlation plot showing modelled site-level co-occurrence of species pairs across all species. Purple cells represent positively co-occurring species pairs, and turquoise cells represent negatively co-occurring species pairs. Species names along both axes are ordered according to the output of hierarchical clustering with Ward’s criterion (Ward 1963) on pairwise co-occurrence values. This figure is a supplement to Fig. 4a in the main text.



## **Literature Cited**

Guisan, A., and N. E. Zimmermann. 2000. Predictive habitat distribution models in ecology. *Ecological Modelling* 145:147–186.

Ovaskainen, O., G. Tikhonov, A. Norberg, F. Guillaume Blanchet, L. Duan, D. Dunson, T. Roslin, and N. Abrego. 2017. How to make more out of community data? A conceptual framework and its implementation as models and software. *Ecology Letters* 20:561–576.

Ward, J. H. 1963. Hierarchical Grouping to Optimize an Objective Function. *Journal of the American Statistical Association* 58:236-244.
